# Supplementary material for: Risk-Dependent Conditional Survival and Failure Hazard After Radiotherapy for Early-Stage Extranodal Natural Killer/T-Cell Lymphoma
Source: PubMed Central journal article supplement (PMC6484659; doi:10.1001/jamanetworkopen.2019.0194), 2019-03-01
Supplement: jamanetwopen-2-e190194-s001.pdf [file jamanetwopen-2-e190194-s001.pdf]

## Supplementary Online Content

Liu X, Wu T, Zhu S-Y, et al. Risk-dependent conditional survival and failure hazard after radiotherapy for early-stage extranodal natural killer/T-cell lymphoma. *JAMA Netw Open*. 2019;2(3):e190194. doi:10.1001/jamanetworkopen.2019.0194

**eTable 1.** Survival outcomes in early-stage NKTCL treated with primary radiotherapy reported in the literature

**eTable 2.** Clinical characteristics of the overall cohort of patients with early-stage NKTCL treated with first-line radiotherapy

**eTable 3.** Annual hazards of death and failure for patients with early-stage natural killer/T-Cell Lymphoma treated with radiotherapy and for patients in each risk group

**eTable 4.** Five-year conditional overall survival probabilities for different risk groups over time

**eTable 5.** Five-year conditional failure-free survival probabilities for different risk groups over time

**eTable 6.** Three-year conditional overall survival probabilities stratified by treatment in low-risk patients

**eTable 7.** Three-year conditional overall survival probabilities stratified by treatment in intermediate-risk patients

**eTable 8.** Three-year conditional overall survival probabilities stratified by treatment in high-risk patients

**eFigure.** Kaplan-Meier curves of overall survival stratified by risk groups

This supplementary material has been provided by the authors to give readers additional information about their work.

**eTable 1.** Survival outcomes in early-stage NKTCL treated with primary radiotherapy reported in the literature

|                       | Cohort | Total  |       |                            |                               | Median RT | 5-year OS   | 5-year PFS  |
|-----------------------|--------|--------|-------|----------------------------|-------------------------------|-----------|-------------|-------------|
| Author                | number | number | Stage | Treatment                  | Chemotherapy regimen          | dose (Gy) | (%)         | or DFS (%)  |
| Cheung 2002 [35]      | 1      | 79     | I-II  | CMT: 61                    | anthracycline-based           | 50        | 40          | 36          |
| Kim 2005 [36]         | 2      | 53     | I-II  | RT: 33, CMT: 20            | CHOP 100%                     | 45        | 69          | NA          |
| Li 2006 [13]          | 3      | 105    | I-II  | RT: 31, CMT: 71,<br>CT: 3  | CHOP 100%                     | 50        | 71          | 59          |
| Huang 2008 [14]†      | 4      | 82     | I-II  | RT: 9, CMT: 65             | CHOP 100%                     | 50        | 57          | 42          |
| Ma 2010 [37]          | 5      | 64     | I-II  | RT: 23, CMT: 41            | CHOP 90%                      | 54        | 59          | 52          |
| Li 2011 [38]          | 6      | 214    | I-II  | RT: 96, CMT: 118           | CHOP 85%                      | 50        | 72          | 65          |
| Li 2012 [15]          | 7      | 87     | I     | RT: 87                     | No                            | 50        | 80          | 69          |
| Yamaguchi 2012<br>[8] | 8      | 33     | I-II  | CCRT: 33                   | DeVIC 100%                    | 50        | 73          | 67          |
| Fang 2014 [39]        | 9      | 124    | II    | CMT: 84, RT: 30,<br>CT: 10 | CHOP 83%                      | 50        | 60          | 48          |
| Oh 2015 [19]          | 10     | 62     | I-II  | CCRT: 62                   | VIPD 52%, L-ASP-<br>based 48% | 40        | 83 (3-year) | 77 (3-year) |

|                    |    |     |      |                                                |                                         |         |             |             |
|--------------------|----|-----|------|------------------------------------------------|-----------------------------------------|---------|-------------|-------------|
| Dong 2016 [40]     | 11 | 78  | I-II | CMT: 33                                        | DICE-L-ASP 100%                         | 45/55   | 89          | 82          |
|                    | 12 |     |      | RT: 45                                         |                                         |         | 49          | 49          |
| Moon 2016[41]†     | 13 | 158 | I-II | CT + RT: 61                                    | CHOP 47%, non-anthracycline-based 53%   | 43.2    | 78          | 63          |
|                    | 14 |     |      | CRT + CT:55                                    |                                         | 43.2    | 70          | 53          |
| Huang 2017 [42]    | 15 | 44  | I-II | IMRT + CT: 44                                  | GDP                                     |         | 85 (3-year) | 77 (3-year) |
| Cao 2017 [44]†     | 16 | 94  | I-II | CRT: 43                                        | CHOP                                    | 50      | 42          | 36          |
| Yang 2017 [45]     | 17 | 37  | I-II | RT ± CT: 29, RT alone 8                        | CHOP 55%, LVP 28, others 15%            | 50      | 76 (3-year) | 64 (3-year) |
| Kwong 2017 [43]*   | 18 | 303 | I-II | RT ± CT: 271, CT alone: 32                     | Non-anthracycline-based                 | 40–52.8 | NA          | NA          |
| Yamaguchi 2017[4]* | 19 | 257 | I-II | CCRT: 183, SCRT: 39, RT alone: 22, CT alone 11 | Non-anthracycline-based 78% (DeVIC 66%) | 50      | 68          | 56          |
| Vargo 2017 [5]*    | 20 | 642 | I-II | CMT: 161                                       | NA                                      | 50      | 58          | NA          |
|                    | 21 |     |      | RT alone: 65                                   |                                         |         | 45          | NA          |

|                   |    |     |      |                        |    |    |    |    |
|-------------------|----|-----|------|------------------------|----|----|----|----|
| SEER (1992-2013)* | 22 | 306 | I-II | CMT: 218, RT alone: 88 | NA | NA | 52 | NA |
|-------------------|----|-----|------|------------------------|----|----|----|----|

\* multicenter cohort.

† patients who received chemotherapy only were excluded from this analysis.

Abbreviations: NKTCL, extranodal NK/T-cell lymphoma, nasal-type; RT, radiotherapy; CT: chemotherapy; OS, overall survival; PFS, progression-free survival; DFS, disease-free survival; NA, not available; CMT, combined modality therapy; CCRT, concurrent chemoradiotherapy; SCRT: sequential chemoradiotherapy; CHOP: cyclophosphamide, doxorubicin, vincristine and prednisolone; IMEP: ifosfamide, methotrexate, etoposide and prednisone; DeVIC: dexamethasone, etoposide, ifosfamide, and carboplatin; DEP: dexamethasone, VP-16 and cisplatin; GELOX, gemcitabine, oxaliplatin, and *L*-asparaginase; VIDP: etoposide, ifosfamide, cisplatin, and dexamethasone; L-ASP, *L*-asparaginase; GEM-based, gemcitabine-based; CEOP: cyclophosphamide, epirubicin, vincristine and prednisone; DICE: etoposide, cyclophosphamide, cisplatin, and dexamethasone; VIDL: etoposide, ifosfamide, dexamethasone, and *L*-asparaginase; GDP, gemcitabine, dexamethasone, and cisplatin; EPOCH, etoposide, doxorubicin, vincristine, cyclophosphamide, and prednisone; LVP, *L*-asparaginase, vincristine, and prednisone; DICE-L-ASP, cisplatin, ifosfamide, etoposide, dexamethasone, *L*-asparaginase; SEER, the Surveillance, Epidemiology and End Results.

**eTable 2.** Clinical characteristics of the overall cohort of patients with early-stage NKTCL treated with first-line radiotherapy

| Characteristics        | Number (%)  |
|------------------------|-------------|
| Gender                 |             |
| Male                   | 1414 (70.2) |
| Female                 | 601 (29.8)  |
| Age (years)            |             |
| ≤ 60                   | 1754 (87.0) |
| > 60                   | 261 (13.0)  |
| B symptoms             |             |
| No                     | 1259 (62.5) |
| Yes                    | 756 (37.5)  |
| Stage                  |             |
| I                      | 1383 (68.6) |
| II                     | 632 (31.4)  |
| Primary tumor invasion |             |
| No                     | 927 (46.0)  |
| Yes                    | 1088 (54.0) |
| Elevated LDH           |             |

|                               |             |
|-------------------------------|-------------|
| No                            | 1464 (72.7) |
| Yes                           | 551 (27.3)  |
| ECOG score                    |             |
| 0-1                           | 1921 (95.3) |
| $\geq 2$                      | 94 (4.7)    |
| Risk groups*                  |             |
| Low (no risk factor)          | 485 (24.1)  |
| Intermediate (1 risk factor)  | 718 (35.6)  |
| High ( $\geq 2$ risk factors) | 812 (40.3)  |

\*Risk factors included: age >60 years, stage II disease, ECOG score  $\geq 2$ , elevated LDH, and the presence of primary tumor invasion.

Abbreviations: NKTCL, extranodal nasal-type NK/T-cell lymphoma; LDH, lactate dehydrogenase; ECOG, Eastern Cooperative Oncology Group.

**eTable 3.** Annual hazards of death and failure for patients with early-stage natural killer/T-Cell Lymphoma treated with radiotherapy

|                               | 1 year    | 2 year    | 3 years | 4 years | 5 years | 6 years | 7 years | 8 years | 9 years | 10 years |
|-------------------------------|-----------|-----------|---------|---------|---------|---------|---------|---------|---------|----------|
| All patients                  |           |           |         |         |         |         |         |         |         |          |
| Annual hazards of death (%)   | 13.7      | 9.0       | 6.8     | 3.9     | 3.5     | 3.0     | 3.8     | 1.6     | 0.6     | 0        |
| 95% CI (%)                    | 13.0-14.3 | 8.5-9.5   | 6.3-7.2 | 3.7-4.2 | 3.3-3.8 | 2.7-3.3 | 3.4-4.2 | 1.4-1.8 | 0.5-0.6 | NA       |
| Annual hazards of failure (%) | 22.1      | 13.0      | 7.5     | 3.7     | 4.2     | 3.7     | 3.6     | 1.8     | 1.2     | 1.6      |
| 95% CI (%)                    | 21.0-23.1 | 12.3-13.8 | 7.0-8.0 | 3.4-3.9 | 3.9-4.6 | 3.3-4.0 | 3.2-4.0 | 1.6-2.0 | 1.0-1.4 | 1.3-1.9  |
| Low-risk patients             |           |           |         |         |         |         |         |         |         |          |
| Annual hazards of death (%)   | 4.8       | 3.1       | 2.9     | 1.6     | 1.1     | 2.9     | 1.9     | 1.2     | 0       | 0        |
| 95% CI (%)                    | 4.4-5.3   | 2.8-3.5   | 2.6-3.3 | 1.4-1.8 | 0.9-1.2 | 2.4-3.4 | 1.5-2.2 | 0.9-1.4 | NA      | NA       |
| Annual hazards of failure (%) | 9.1       | 7.0       | 3.6     | 3.7     | 4.2     | 3.7     | 3.6     | 1.8     | 1.2     | 1.6      |
| 95% CI (%)                    | 8.3-10.0  | 6.3-7.7   | 3.1-4.0 | 3.4-3.9 | 3.9-4.6 | 3.3-4.0 | 3.2-4.0 | 1.6-2.0 | 1.0-1.4 | 1.3-1.9  |
| Intermediate -risk patients   |           |           |         |         |         |         |         |         |         |          |
| Annual hazards of death (%)   | 11.4      | 9.0       | 6.7     | 4.3     | 4.8     | 1.8     | 4.1     | 0       | 0       | 0        |
| 95% CI (%)                    | 10.5-12.3 | 8.2-9.8   | 6.0-7.4 | 3.9-4.8 | 4.1-5.4 | 1.5-2.1 | 3.4-4.8 | NA      | NA      | NA       |
| Annual hazards of failure (%) | 20.1      | 14.1      | 7.7     | 4.6     | 3.0     | 3.4     | 3.7     | 0       | 0       | 3.6      |
| 95% CI (%)                    | 18.5-21.6 | 12.8-15.4 | 6.9-8.5 | 4.1-5.2 | 2.6-3.4 | 2.8-3.9 | 3.0-4.3 | NA      | NA      | 2.7-4.6  |

| High-risk patients            |           |           |          |         |         |         |         |         |         |    |
|-------------------------------|-----------|-----------|----------|---------|---------|---------|---------|---------|---------|----|
| Annual hazards of death (%)   | 21.6      | 13.6      | 10.4     | 5.9     | 4.6     | 4.8     | 5.7     | 4.7     | 2.2     | 0  |
| 95% CI (%)                    | 20.0-23.2 | 12.4-14.8 | 9.3-11.5 | 5.2-6.7 | 3.9-5.3 | 3.9-4.6 | 4.5-6.9 | 3.5-5.8 | 1.6-2.9 | NA |
| Annual hazards of failure (%) | 32.7      | 17.0      | 11.1     | 3.5     | 5.9     | 5.4     | 5.2     | 5.2     | 2.6     | 0  |
| 95% CI (%)                    | 30.2-35.2 | 15.4-18.6 | 9.8-12.4 | 3.0-4.0 | 5.0-6.8 | 4.4-6.4 | 4.0-6.3 | 3.9-6.6 | 1.8-3.4 | NA |

Abbreviations: CI, confidence interval; NA, not available.



**eTable 4.** Five-year conditional overall survival probabilities for different risk groups over time

| Risk groups                       |              | Time since treatment |           |           |           |           |              |
|-----------------------------------|--------------|----------------------|-----------|-----------|-----------|-----------|--------------|
|                                   |              | 0 year               | 1 year    | 2 years   | 3 years   | 4 years   | 5years       |
| Low-risk                          | 5-year COS   | 87.2                 | 89.1      | 90.2      | 91.9      | 93.4      | 94.4         |
|                                   | 95% CI       | 83.2-90.3            | 84.4-92.4 | 84.9-93.7 | 86.1-95.4 | 87.5-96.6 | 88.6-97.4    |
| Intermediate-risk                 | 5-year COS   | 69.3                 | 76.5      | 80.5      | 86.1      | 90.0      | 94.4         |
|                                   | 95% CI       | 65.0-73.1            | 71.8-80.5 | 75.0-84.9 | 80.6-90.2 | 84.4-93.5 | 89.1-97.2    |
| High-risk                         | 5-year COS   | 57.5                 | 67.5      | 73.0      | 77.1      | 80.2      | 83.6         |
|                                   | 95% CI       | 53.2-61.5            | 62.0-72.3 | 66.1-78.7 | 68.6-83.5 | 70.7-86.8 | 73.7-90.1    |
| Intermediate-risk vs.<br>low-risk | HR for death | 2.41                 | 2.42      | 2.21      | 2.15      | 1.95      | 1.37         |
|                                   | 95% CI       | 1.79-3.24            | 1.66-3.53 | 1.38-3.53 | 1.18-3.93 | 0.96-4.00 | 0.56 to 3.20 |
|                                   | P            | < 0.001              | < 0.001   | 0.001     | 0.010     | 0.06      | 0.47         |
| High-risk vs. low-risk            | HR for death | 4.01                 | 3.66      | 3.31      | 3.15      | 2.93      | 2.58         |
|                                   | 95% CI       | 3.01-5.33            | 2.52-5.30 | 2.07-5.29 | 1.70-5.80 | 1.41-6.12 | 1.11-5.99    |
|                                   | P            | < 0.001              | < 0.001   | < 0.001   | <0.001    | 0.003     | 0.02         |

Abbreviations: COS, conditional overall survival; HR, hazard ratio; CI, confidence interval.

**eTable 5.** Five-year conditional failure-free survival probabilities for different risk groups over time

|                                |                         | Time since treatment |           |           |           |           |           |
|--------------------------------|-------------------------|----------------------|-----------|-----------|-----------|-----------|-----------|
| Risk groups                    |                         | 0 year               | 1 year    | 2 years   | 3 years   | 4 years   | 5years    |
| Low-risk                       | 5-year CFFS             | 76.7                 | 82.1      | 86.3      | 88.1      | 88.7      | 92.4      |
|                                | 95% CI                  | 71.8-80.8            | 76.8-86.4 | 80.4-90.6 | 81.4-92.5 | 80.7-93.5 | 84.0-96.5 |
| Intermediate-risk              | 5-year CFFS             | 61.1                 | 72.3      | 80.2      | 86.5      | 90.6      | 90.0      |
|                                | 95% CI                  | 56.8-65.0            | 67.3-76.7 | 76.4-84.8 | 80.6-90.7 | 84.7-94.3 | 81.9-94.6 |
| High-risk                      | 5-year CFFS             | 50.4                 | 65.4      | 73.2      | 77.4      | 78.2      | 83.0      |
|                                | 95% CI                  | 46.2-54.5            | 59.5-70.6 | 65.8-79.2 | 68.3-84.2 | 67.9-85.5 | 72.2-89.9 |
| Intermediate-risk vs. low-risk | HR for failure or death | 1.96                 | 1.77      | 1.60      | 1.36      | 1.23      | 1.59      |
|                                | 95% CI                  | 1.55-2.47            | 1.30-2.42 | 1.05-2.44 | 0.81-2.28 | 0.66-2.27 | 0.74-3.43 |
|                                | P                       | < 0.001              | < 0.001   | 0.03      | 0.25      | 0.52      | 0.23      |
| High-risk vs. low-risk         | HR for failure or death | 2.83                 | 2.26      | 2.15      | 1.70      | 1.85      | 2.19      |
|                                | 95% CI                  | 2.26-3.54            | 1.66-3.08 | 1.41-3.28 | 0.99-2.91 | 0.99-3.45 | 0.98-4.91 |
|                                | P                       | < 0.001              | < 0.001   | < 0.001   | 0.05      | 0.05      | 0.05      |

Abbreviations: CFFS, conditional failure-free survival; HR, hazard ratio; CI, confidence interval.

**eTable 6.** Three-year conditional overall survival probabilities stratified by treatment in low-risk patients

| Treatment             |            | Time since treatment |           |           |           |           |          |
|-----------------------|------------|----------------------|-----------|-----------|-----------|-----------|----------|
|                       |            | 0 year               | 1 year    | 2 years   | 3 years   | 4 years   | 5years   |
| RT and new CT regimen | 3-year COS | 91.1                 | 93.9      | 92.3      | 92.2      | 92.2      | NA       |
|                       | 95% CI     | 86.3-96.2            | 89.6-98.5 | 84.6-100  | 82.3-100  | 82.3-100  | NA       |
| RT and old CT regimen | 3-year COS | 88.3                 | 90.5      | 94.1      | 95.4      | 95.4      | 96.3     |
|                       | 95% CI     | 83.3-93.5            | 95.7-95.6 | 89.9-98.5 | 91.0-99.9 | 91.0-99.9 | 92.4-100 |
| RT alone              | 3-year COS | 89.8                 | 94.1      | 96.0      | 97.3      | 95.7      | 90.9     |
|                       | 95% CI     | 84.4-95.5            | 89.2-99.3 | 91.7-100  | 93.6-100  | 87.7-100  | 79.6-100 |
|                       | P          | 0.64                 | 0.56      | 0.83      | 0.97      | 0.76      | 0.99     |

Abbreviations: RT, radiotherapy; CT: chemotherapy; COS, conditional overall survival; HR, hazard ratio; CI, confidence interval; NA, not available.

**eTable 7.** Three-year conditional overall survival probabilities stratified by treatment in intermediate-risk patients

| Treatment             |            | Time since treatment |           |           |           |           |           |
|-----------------------|------------|----------------------|-----------|-----------|-----------|-----------|-----------|
|                       |            | 0 year               | 1 year    | 2 years   | 3 years   | 4 years   | 5years    |
| RT and new CT regimen | 3-year COS | 80.0                 | 83.0      | 87.5      | 92.0      | 95.9      | NA        |
|                       | 95% CI     | 74.5-85.8            | 76.8-89.6 | 80.3-95.2 | 85.4-99.1 | 90.6-100  | NA        |
| RT and old CT regimen | 3-year COS | 72.7                 | 80.9      | 84.2      | 88.8      | 90.2      | 95.1      |
|                       | 95% CI     | 67.5-78.3            | 75.7-86.3 | 79.0-89.8 | 83.8-94.2 | 85.1-95.7 | 91.0-99.4 |
| RT alone              | 3-year COS | 75.7                 | 83.2      | 86.7      | 92.1      | 89.7      | 93.2      |
|                       | 95% CI     | 68.5-83.6            | 75.9-91.2 | 79.2-94.9 | 85.6-99.1 | 80.3-100  | 84.6-100  |
|                       | P          | 0.12                 | 0.67      | 0.53      | 0.82      | 0.66      | 0.43      |

Abbreviations: RT, radiotherapy; CT: chemotherapy; COS, conditional overall survival; HR, hazard ratio; CI, confidence interval; NA, not available.

**eTable 8.** Three-year conditional overall survival probabilities stratified by treatment in high-risk patients

| Treatment                                          |              | Time since treatment |           |           |           |           |           |
|----------------------------------------------------|--------------|----------------------|-----------|-----------|-----------|-----------|-----------|
|                                                    |              | 0 year               | 1 year    | 2 years   | 3 years   | 4 years   | 5 years   |
| RT and new CT regimen                              | 3-year COS   | 73.3                 | 81.4      | 87.8      | 88.4      | 93.2      | NA        |
|                                                    | 95% CI       | 68.3-78.7            | 75.3-87.9 | 80.9-95.4 | 78.9-99.1 | 84.3-100  | NA        |
| RT and old CT regimen                              | 3-year COS   | 60.0                 | 71.0      | 78.9      | 85.0      | 84.8      | 86.8      |
|                                                    | 95% CI       | 54.6-65.9            | 65.1-77.4 | 72.8-85.4 | 78.8-92.4 | 77.8-92.4 | 79.4-94.9 |
| RT alone                                           | 3-year COS   | 46.5                 | 66.1      | 75.4      | 86.1      | 80.5      | NA        |
|                                                    | 95% CI       | 37.2-58.2            | 53.9-81.2 | 63.0-90.3 | 72.3-100  | 62.0-100  | NA        |
| RT and old CT regimen vs.<br>RT and new CT regimen | HR for death | 1.49                 | 1.60      | 1.77      | 1.34      | 1.81      | NA        |
|                                                    | 95% CI       | 1.13-1.95            | 1.07-2.39 | 0.94-3.33 | 0.54-3.56 | 0.41-8.01 | NA        |
|                                                    | P            | 0.004                | 0.02      | 0.07      | 0.53      | 0.43      | NA        |
| RT alone vs. RT and new<br>CT regimen              | HR for death | 2.42                 | 1.82      | 2.69      | 1.57      | 1.84      | NA        |
|                                                    | 95% CI       | 1.73-3.39            | 1.05-3.17 | 1.23-5.90 | 0.46-5.28 | 0.30-11.2 | NA        |
|                                                    | P            | <0.001               | 0.03      | 0.01      | 0.47      | 0.50      | NA        |

Abbreviations: RT, radiotherapy; CT: chemotherapy; COS, conditional overall survival; HR, hazard ratio; CI, confidence interval; NA, not available.



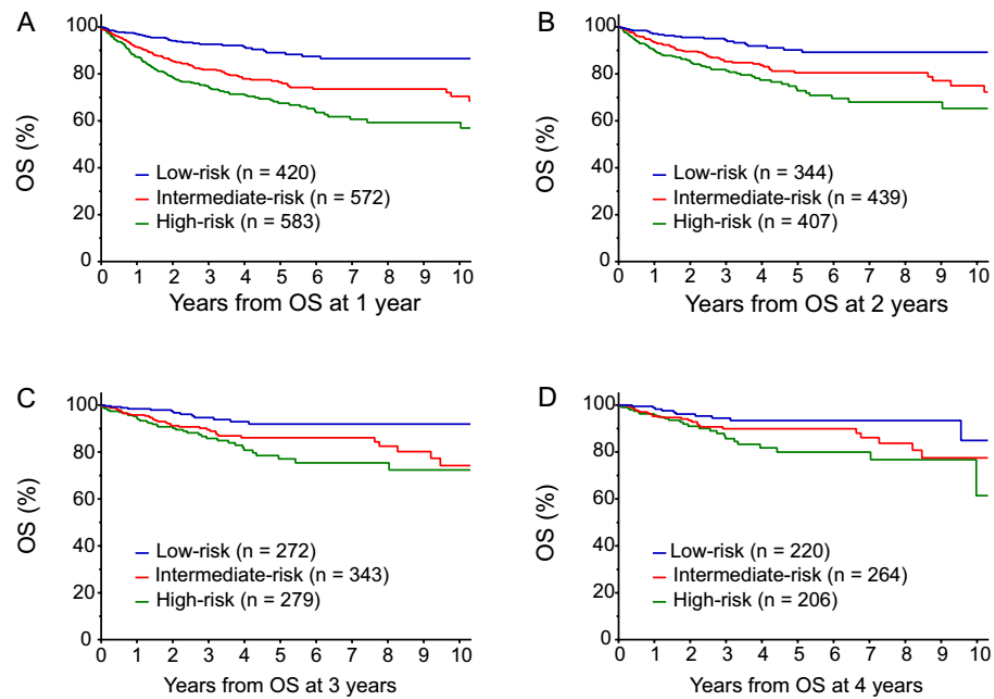

Supplemental Fig. 1

**eFigure.** Kaplan-Meier curves of overall survival stratified by risk groups

Kaplan-Meier curves of overall survival (OS) between low-risk, intermediate-risk and high-risk patients who were surviving at (A) 1 year, (B) 2 years, (C) 3 years and (D) 4 years.
